# Supplementary material
Source: Research Square preprint supplement (doi:10.21203/rs.3.rs-9316606/v1)
Supplement: Supplementary file 1 [file 4a9c9e39de644bb3ef52983c.docx]

Questionnaires for assessment of knowledge, attitude and practices of abattoir workers.

1. What is your highest level of education completed?

- Illiterate / No formal schooling [ ]
- Elementary school (From grade (1- 4), (5- 8))
- High school (From grade 9- 12) [ ]
- College and above [ ]

2. How did you acquire your butchering/working skills?

- Formal training program [ ]
- Observation of others [ ]
- Learned from parents/family at home [ ]

3. What is your responsibility in the abattoir?

- Carcass processor [ ]
- Meat inspector [ ]
- Cleaner [ ]
- Others [ ] ________

4**.** How long did you work in the abattoir?

- From two – five years [ ]
- From six – ten years [ ]
- Above ten years [ ]
- Others [ ] __________

5. Did you get job related training?

- Yes [ ]
- No [ ]
- Other [ ] __________

6. If yes, when you got the training?

- Before six months ago [ ]
- Before one year ago [ ]
- Before two years ago [ ]

7. How often do you clean your knives?

- Before work [ ]
- End of work [ ]
- When excessively soiled [ ]
- Between work [ ]
- Other [ ]: __________

8. What do you use to clean your butchering knives?

- Water only [ ]
- Hot water and detergent [ ]
- Chemical disinfectant [ ]
- Other [ ]: __________

9. Do you wash your hands after separating intestinal contents?

- Yes [ ]
- No [ ]

10. When do you typically wash your hands during the butchering process?

- Before starting work [ ]
- After evisceration [ ]
- Between every animal [ ]
- Only at the end of the shift [ ]

11. How often do you clean the abattoir floor?

- Before work [ ]
- Constantly between work tasks [ ]
- Only when it becomes excessively soiled [ ]
- Only at the end of the working day [ ]

12. Questionnaire items responded by keen observation of the researcher.

| **Item to observe** | **Status/Method noted** |
| --- | --- |
| Water source | Municipal Tap (Chlorinated) [ ] Other [ ]:___ |
| Stunning Method | Manual [ ] Mechanical [ ] Other [ ]: |
| Dressing Method | Horizontal [ ] Vertical (Overhead) [ ] |
| Evisceration Method | Horizontal [ ] Vertical (Overhead) [ ] |
| Equipment Ownership | Workers use private knives [ ] Facility provided [ ] |
