# Supplementary material
Source: Research Square preprint supplement (doi:10.21203/rs.3.rs-9316606/v1)
Supplement: Supplementary file 2 [file b4ca05d6071f97ae1d07e087.docx]

Questionnaire for abattoir workers personal hygiene

1. Do you wash your hands after using the bathroom?
   - Yes [ ]
   - No [ ]
2. What is your typical manner of washing hands after using the bathroom?
   - Using water and soap [ ]
   - Using water only [ ]
   - I do not wash my hands [ ]
3. Do you wash your hands immediately before slaughtering?
   - Yes [ ]
   - No [ ]
4. If yes, what is your method of hand washing before slaughtering?
   - Using water only [ ]
   - Using water and soap [ ]
5. Do you wear protective clothes while working?
   - Yes [ ]
   - No [ ]
6. How often do you wear your protective clothes?
   - Always [ ]
   - Usually [ ]
   - Sometimes [ ]
7. How often do you wear a hair cover?
   - Usually [ ]
   - Rarely [ ]
   - Not at all [ ]
8. How often do you wear protective boots?
   - Usually [ ]
   - Rarely [ ]
9. Do you wear any jewelry (rings, bracelets, watches) while working?
   - Yes [ ]
   - No [ ]
10. What is the current condition of your fingernails?
    - Short and polished/clean [ ]
    - Not short and polished/clean [ ]
11. Do you smoke cigarettes?
    - Yes [ ]
    - No [ ]
12. If you smoke, at what time do you usually do so?
    - Before work [ ]
    - Between work (during breaks) [ ]
    - At the end of work [ ]
13. Have you experienced diarrhea within the last month?
    - Yes [ ]
    - No [ ]
14. Have you used any antibiotic drugs in the past 15 days?
    - Yes [ ]
    - No [ ]
